# Supplementary material for: Effect of the Y : B ratio on phase purity and development of thermally stable nano-sized Eu+3-doped YBO3 red phosphor using sodium borohydride
Source: Royal Society of Chemistry journal article supplement (doi:10.1039/c5dt00875a), 2015-01-01
Supplement: c5dt00875a1.pdf [file c5dt00875a1.pdf]

**ELECTRONIC SUPPLEMENTARY INFORMATION  
FOR  
DALTON TRANSACTIONS**

**Effect of the Y:B ratio on phase purity and development of thermally stable nano-sized  
Eu<sup>+3</sup>-doped YBO<sub>3</sub> red phosphor using sodium borohydride**

**BY**

Shubham Srivastava, Shantanu K. Behera, Bibhuti B. Nayak\*

Department of Ceramic Engineering, National Institute of Technology Rourkela, Odisha, India  
769 008

\*Corresponding address: [bbnayak@nitrkl.ac.in](mailto:bbnayak@nitrkl.ac.in), [bibhutib@gmail.com](mailto:bibhutib@gmail.com) (Bibhuti B. Nayak),  
Phone: +91 661 246 2209

Figure S1 indicates the excitation spectra of YBO<sub>3</sub>: Eu<sup>3+</sup> sample at an emission wavelength of 612 nm. This gives the basis for using 230 nm as the excitation wavelength.

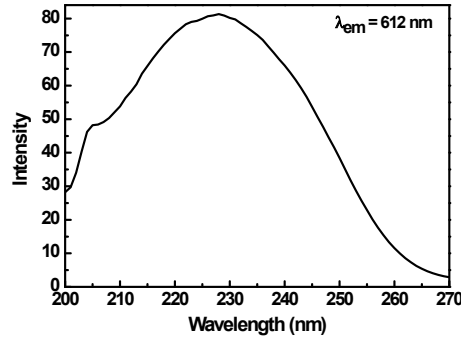

Figure S1: Excitation spectra of YBO<sub>3</sub>: Eu<sup>3+</sup> sample.

The crystallite size (nm) of YBO<sub>3</sub>: Eu<sup>3+</sup> sample, heated at different temperatures is given in Table S1. The crystallite size was calculated using Scherrer's formula [*B. D. Cullity, Elements of X-ray Diffraction, 2<sup>nd</sup> edition, Addison-Wesley Publishing Company, Inc., Page no: 102*] i.e. crystallite size (nm) =  $0.9 \lambda / (\beta \times \cos \theta_B)$ , where  $\lambda$  is the wavelength of Cu K $\alpha$  (0.154 nm),  $\beta$  is the Full width at half maximum (FWHM) and  $\theta_B$  is the Bragg's angle.  $\beta$  is expressed as  $(\beta_s^2 - \beta_{std}^2)^{1/2}$ , where  $\beta_s$  is the FWHM of sample and  $\beta_{std}$  is the FWHM value (0.0511) for standard Si-wafer sample. The Table S1 suggests that the crystallite size of un-doped and Eu<sup>3+</sup>-doped sample varies in between around 35 to 50 nm. The obtained lattice parameter and cell volume are also given in Table S1.

Table S1: Crystallite size, lattice parameter and cell volume of un-doped and Eu<sup>3+</sup>-doped YBO<sub>3</sub> sample heated at different temperatures.

|                                          | 2 $\theta$ (degree) | FWHM   | crystallite size (nm) | Lattice parameter a=b, c (Å) | Cell volume (Å <sup>3</sup> ) |
|------------------------------------------|---------------------|--------|-----------------------|------------------------------|-------------------------------|
| Un-doped YBO <sub>3</sub>                |                     |        |                       |                              |                               |
| 800 °C                                   | 27.057              | 0.2337 | 35.44                 | 3.79, 8.84                   | 110.14                        |
| 1000°C                                   | 27.225              | 0.2012 | 41.55                 | 3.77, 8.80                   | 108.85                        |
| 1100°C                                   | 27.277              | 0.1922 | 43.65                 | 3.77, 8.79                   | 108.53                        |
| 1200°C                                   | 27.175              | 0.1842 | 45.69                 | 3.78, 8.81                   | 108.90                        |
| 1300°C                                   | 27.172              | 0.1783 | 47.33                 | 3.78, 8.80                   | 108.88                        |
| 1400°C                                   | 27.225              | 0.1712 | 49.49                 | 3.77, 8.80                   | 108.79                        |
| Eu <sup>3+</sup> -doped YBO <sub>3</sub> |                     |        |                       |                              |                               |
| 800°C                                    | 27.072              | 0.2245 | 36.98                 | 3.79, 8.83                   | 110.45                        |
| 1000°C                                   | 27.165              | 0.2179 | 38.17                 | 3.78, 8.81                   | 109.37                        |
| 1100°C                                   | 27.185              | 0.1898 | 44.23                 | 3.78, 8.82                   | 109.50                        |
| 1200°C                                   | 27.095              | 0.1837 | 45.81                 | 3.79, 8.83                   | 109.95                        |
| 1300°C                                   | 27.146              | 0.1755 | 48.15                 | 3.79, 8.83                   | 109.83                        |
| 1400°C                                   | 27.185              | 0.1707 | 49.64                 | 3.78, 8.83                   | 109.26                        |

Figure S2 (a) and (b) shows FESEM micrograph of un-doped  $\text{YBO}_3$ , calcined at 800 °C and 1200 °C, respectively. The particles are agglomerated in nature for both calcined samples. However, the average agglomerated particle size was 100 to 200 nm at 800 °C, whereas 500 nm to 2  $\mu\text{m}$  at 1200 °C.

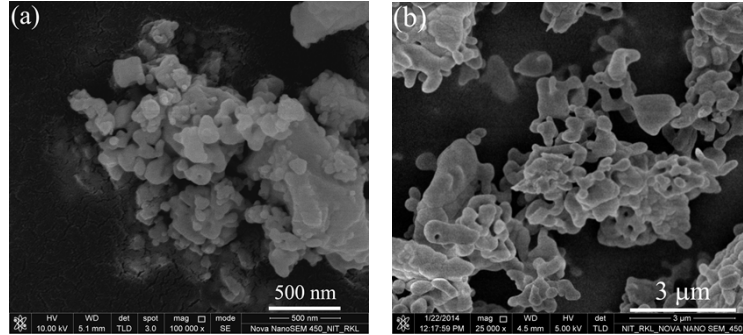

Figure S2: FESEM micrograph of un-doped  $\text{YBO}_3$ , calcined at (a) 800 °C and (b) 1200 °C.

The particle morphology of un-doped  $\text{YBO}_3$  was also observed in TEM. Fig. S3 (a) and (b) indicates the TEM micrographs of un-doped  $\text{YBO}_3$ , calcined at 800 °C and 1200 °C, respectively. The particle size of un-doped  $\text{YBO}_3$ , calcined at 800 °C was  $\sim 8\text{-}10$  nm, whereas, for the sample calcined at 1200°C, the particles were agglomerated in nature and the average particle size was found to be 100-300 nm.

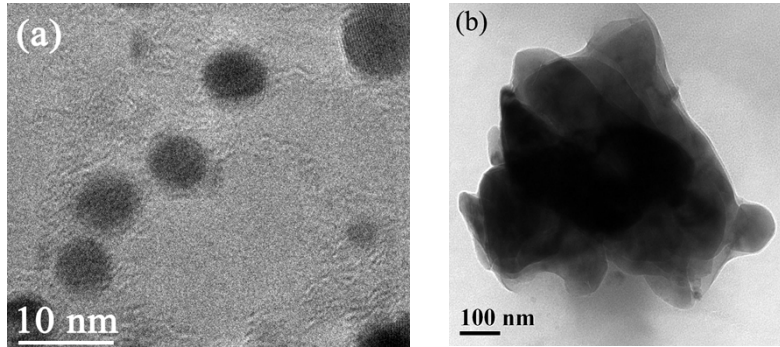

Figure S3: TEM micrograph of un-doped  $\text{YBO}_3$ , calcined at (a) 800 °C and (b) 1200 °C.

In order to confirm the purity along with the qualitative and quantitative composition of  $\text{Y}_{0.9}\text{Eu}_{0.1}\text{BO}_3$ , its EDS analysis was performed. Figure S4 shows EDS mapping of  $\text{YBO}_3$ :  $\text{Eu}^{3+}$  phosphor calcined at two different temperatures. It was confirmed that the sample contained yttrium, boron, oxygen and europium and no impurities. The typical EDS spectrum was also shown in Fig. S4 and it was used to further characterize the composition of the phosphor sample. The EDS spectrum of  $\text{YBO}_3$ :  $\text{Eu}^{3+}$  sample shows the presence of Y, B, O and Eu. Quantitative testing of the atom concentrations of the sample performed at different point

positions are listed in Table S2. The Eu concentration was calculated by the Eu atomic concentration divided by the sum of Y and Eu atomic concentration [Q. Dong, Y. Wang, Z. Wang, X. Yu, and B. Liu, *J. Phys. Chem. C*, 2010,**114**, 9245], which are also shown in Table S2. From EDS quantitative microanalysis, the amount of  $\text{Eu}^{3+}$  in  $\text{YBO}_3$  phosphor is calculated as nearly 10 %.

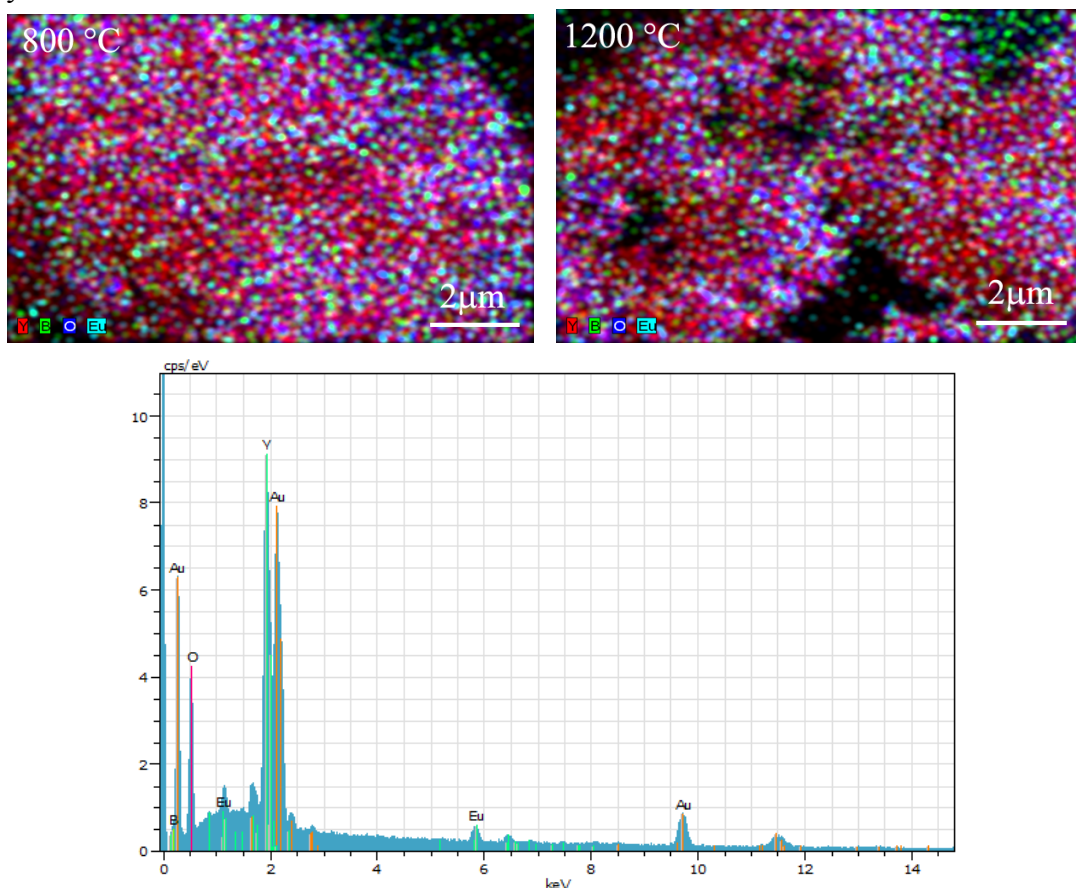

Figure S4: EDS mapping and EDS spectra of  $\text{YBO}_3$ :  $\text{Eu}^{3+}$  phosphor.

Table S2: Concentration of Eu in  $\text{YBO}_3$  phosphor was determined based on atom concentration measured by EDS at different position.

| Different position | Atomic % obtained from EDS |       |       |      | Calculated Eu% from EDS data |
|--------------------|----------------------------|-------|-------|------|------------------------------|
|                    | Y                          | B     | O     | Eu   |                              |
| 1                  | 35.67                      | 14.60 | 45.26 | 4.47 | 11.13                        |
| 2                  | 42.29                      | 16.12 | 36.93 | 4.66 | 9.92                         |
| 3                  | 30.95                      | 16.6  | 48.88 | 3.57 | 10.34                        |
